# Supplementary material for: From Knowledge Transfer to Action: An Example of a Community of Practice for First-Episode Psychosis in Lyon, France
Source: Atypon-hosted journal article supplement (doi:10.1176/appi.ps.201900568), 2020-05-28
Supplement: appi.ps.201900568.ds001.pdf [file appi.ps.201900568.ds001.pdf]

**TABLE. Key factors of FEP CoP design based on CIHR KT framework<sup>7</sup>**

| <b>Key factors of the CoP design<sup>a</sup></b> | <b>CoP planification</b>                                                                        | <b>Modifications following the launch</b>                                                             |
|--------------------------------------------------|-------------------------------------------------------------------------------------------------|-------------------------------------------------------------------------------------------------------|
| <b>Goals</b>                                     | Increase knowledge awareness<br>Change practice in FEP                                          | None                                                                                                  |
| <b>Audience</b>                                  | Researchers in psychiatry and clinicians                                                        | Inclusion of not-for-profit organization (e.g., UNAFAM <sup>b</sup> )                                 |
| <b>Strategies</b>                                |                                                                                                 |                                                                                                       |
| Diffusion                                        | Meetings of the CoP<br>Specific mailing list                                                    | Inclusion of new members in meetings<br>Edition of the initial mailing list that includes new members |
| Dissemination                                    | Social marketing (Facebook)<br>Open conferences<br>Specific exchanges via email                 | Conference presentations<br>None                                                                      |
| Application                                      | Adapt knowledge for use<br>Translate guidelines to French<br>Evaluate barriers and facilitators | None                                                                                                  |
| <b>Expertise</b>                                 | Community leaders<br>Expert academics                                                           | None                                                                                                  |
| <b>Resources</b>                                 |                                                                                                 |                                                                                                       |
| Staff                                            | The early adopters of the CoP                                                                   | Specific missions for volunteers                                                                      |
| Budget allocation                                | None                                                                                            | None                                                                                                  |

<sup>a</sup>: adapted from CIHR KT plan worksheet

<sup>b</sup>: UNAFAM (*Union Nationale des Familles*) is a national association of families and relatives of people with mental disorders
